# Supplementary material
Source: Springer Nature journal article supplement (https://www.springermedizin.de/resource/supplementary/12943_2011_1002_MOESM6_ESM.pdf/9552064)

A

C1.1 (GFP)

H2 (SPARC-GFP)

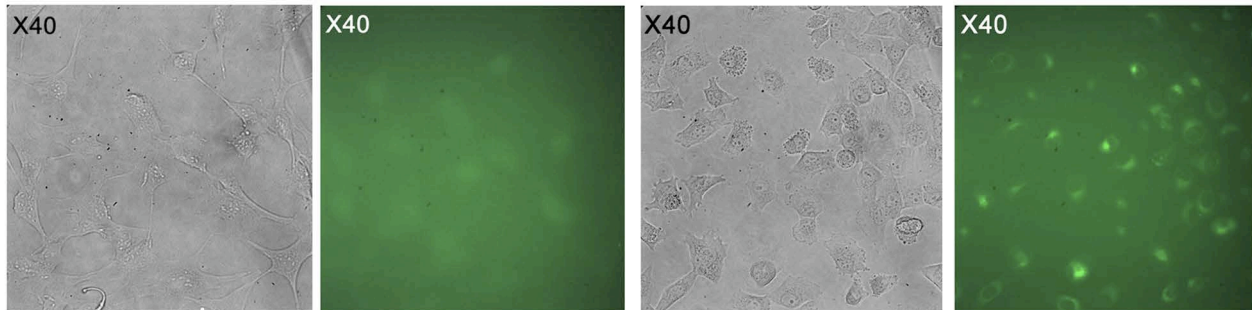

B

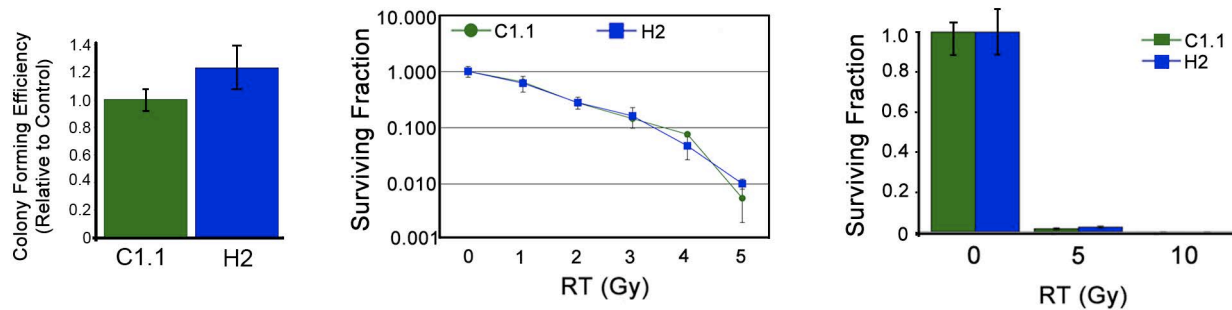

C

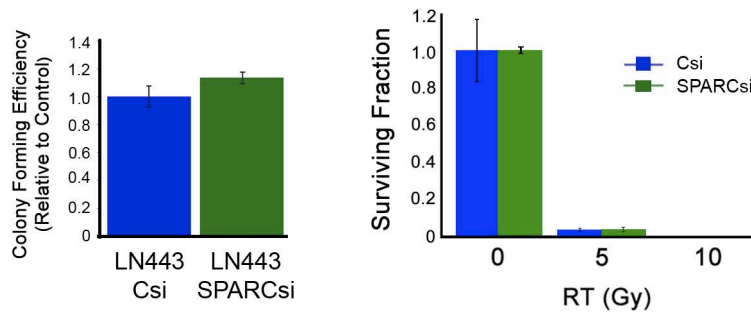

Supplement: MOESM6 [file 9552064]
